# Supplementary material for: CODA: Accurate Detection of Functional Associations between Proteins in Eukaryotic Genomes Using Domain Fusion
Source: PLoS One. 2010 Jun 1;5(6):e10908. doi: 10.1371/journal.pone.0010908 (PMC2879367; doi:10.1371/journal.pone.0010908)
Supplement: Dataset S1 — Novel functional annotation assigned to human gene products using CODA. (0.33 MB XLS) [file pone.0010908.s011.xls]

## Sheet: Sheet1
UniProt identifier	GO terms
Q8NI37	GO:0007165|TAS GO:0006816|IDA GO:0009187|NAS GO:0007165|NAS GO:0007601|TAS
Q5JTI7	GO:0006367|IDA GO:0030521|IDA GO:0045944|IDA GO:0006367|IDA GO:0030521|IDA GO:0045944|IDA
Q5JTI9	GO:0006367|IDA GO:0030521|IDA GO:0045944|IDA GO:0006367|IDA GO:0030521|IDA GO:0045944|IDA
Q5VWA5	GO:0006672|TAS GO:0007165|TAS
Q5QGT2;Q6NUK4;Q6PJY4;Q5JQR5;Q6PEW8	GO:0006357|TAS GO:0006357|TAS
Q7L9B9	GO:0006281|NAS GO:0006260|NAS GO:0000279|IEP GO:0006281|NAS GO:0006260|NAS GO:0000279|IEP
Q5M7Z8	GO:0007585|TAS GO:0008535|TAS GO:0007585|TAS GO:0008535|TAS
Q5T0R4	GO:0007049|NAS GO:0000070|TAS GO:0048015|NAS GO:0007051|NAS GO:0007049|NAS GO:0000070|TAS GO:0048015|NAS GO:0007051|NAS
Q7Z7A3;Q96GZ7	GO:0006520|TAS GO:0009113|TAS GO:0006564|NAS GO:0008615|NAS GO:0006461|TAS GO:0000096|TAS GO:0009113|TAS
Q5T0R7	GO:0007049|NAS GO:0000070|TAS GO:0048015|NAS GO:0007051|NAS GO:0007049|NAS GO:0000070|TAS GO:0048015|NAS GO:0007051|NAS
Q9H8W0	GO:0006367|IDA GO:0030521|IDA GO:0045944|IDA GO:0006367|IDA GO:0030521|IDA GO:0045944|IDA
Q6ZUX2	GO:0006401|TAS GO:0009615|TAS GO:0006401|TAS GO:0009615|TAS
Q5T8V1	GO:0006412|NAS GO:0006412|NAS
Q7Z327;Q8IY39;Q7Z6V5	GO:0007585|TAS GO:0008535|TAS
Q5JTI5	GO:0006367|IDA GO:0030521|IDA GO:0045944|IDA GO:0006367|IDA GO:0030521|IDA GO:0045944|IDA
Q8TCB7;Q96LU4	GO:0008152|IDA GO:0006633|IDA GO:0008152|IDA GO:0006633|IDA
Q96HR9;Q96LM0	GO:0006357|TAS GO:0006357|TAS
Q5VVM0	GO:0045333|NAS GO:0006118|NAS
Q0VGD4	GO:0009113|TAS GO:0009113|TAS
Q7Z5U5	GO:0009113|TAS GO:0009113|TAS
Q5T0R9	GO:0007049|NAS GO:0000070|TAS GO:0048015|NAS GO:0007051|NAS GO:0007049|NAS GO:0000070|TAS GO:0048015|NAS GO:0007051|NAS
Q86U90	GO:0006796|TAS GO:0006796|TAS GO:0006796|TAS
Q86YL1	GO:0006401|TAS GO:0009615|TAS GO:0006928|TAS GO:0006928|TAS GO:0006401|TAS GO:0009615|TAS GO:0006928|TAS GO:0006928|TAS
Q5JUX3	GO:0006944|TAS GO:0006944|TAS
Q96EI3;Q96IX1;Q6FI88;Q9Y6B4;Q6XYB0;Q9H0W9	GO:0008544|TAS GO:0006582|NAS
Q5T6J8	GO:0006118|IDA GO:0009051|IDA
Q5JTI8	GO:0006367|IDA GO:0030521|IDA GO:0045944|IDA GO:0006367|IDA GO:0030521|IDA GO:0045944|IDA
Q86XN3	GO:0006545|NAS GO:0009165|NAS GO:0006545|NAS GO:0009165|NAS
O43341	GO:0006401|TAS GO:0009615|TAS GO:0006401|TAS GO:0009615|TAS
Q9P1A0	GO:0006401|TAS GO:0009615|TAS GO:0006401|TAS GO:0009615|TAS GO:0006954|TAS GO:0006800|TAS
Q5T0S2	GO:0007049|NAS GO:0000070|TAS GO:0048015|NAS GO:0007051|NAS GO:0007049|NAS GO:0000070|TAS GO:0048015|NAS GO:0007051|NAS
Q9H825	GO:0008152|IDA GO:0006633|IDA GO:0008152|IDA GO:0006633|IDA
Q86WR0;Q9NV98;Q96SI2	GO:0009113|TAS GO:0009113|TAS
Q6ZW71;Q9BVQ3;Q9NRG7	GO:0007159|NAS GO:0042351|TAS GO:0005975|TAS GO:0007159|NAS GO:0042351|TAS GO:0009225|TAS GO:0006703|TAS GO:0006702|TAS GO:0006629|TAS GO:0007159|NAS GO:0042351|TAS GO:0005975|TAS GO:0006629|TAS
Q6ZRJ8	GO:0006556|IDA GO:0006556|IDA
Q8NA58	GO:0007292|TAS GO:0009451|TAS GO:0007292|TAS GO:0009451|TAS
Q8N7X5;Q5TAP7	GO:0007292|TAS GO:0009451|TAS
Q6DKI4;Q96LA8;Q9NVR8	GO:0008152|IDA GO:0006633|IDA GO:0008152|IDA GO:0006633|IDA
Q5TAW9;Q9BWV3	GO:0007585|TAS GO:0008535|TAS
Q86SK8	GO:0006464|TAS GO:0006464|TAS
Q9H6I5;Q9H6H4;Q86VL1;Q9HBP4	GO:0006357|TAS GO:0006357|TAS
Q9HAU7;Q8IUT9;Q9HAT2;Q9NT71	GO:0007399|TAS GO:0006629|TAS GO:0006954|TAS
Q8N467	GO:0007585|TAS GO:0007585|TAS
Q9BZH2	GO:0007585|TAS GO:0008535|TAS GO:0007585|TAS GO:0008535|TAS
Q6IT77	GO:0006298|TAS GO:0008630|TAS GO:0006298|TAS GO:0008630|TAS
Q86SK7	GO:0006464|TAS
Q0VG05	GO:0006366|TAS
Q8TAR0;Q8NBX0;Q9Y363	GO:0006595|TAS GO:0006555|TAS GO:0015992|TAS GO:0006099|TAS GO:0006118|TAS GO:0006595|TAS GO:0006555|TAS GO:0015992|TAS GO:0006099|TAS GO:0006118|TAS
Q8IUQ5	GO:0006508|TAS GO:0006508|TAS
Q8N140	GO:0006412|TAS
Q6VNZ8	GO:0009399|TAS GO:0016226|TAS GO:0009399|TAS GO:0016226|TAS
Q9NWU2;Q8N5M5	GO:0007049|TAS GO:0007067|TAS GO:0006364|TAS
Q96FC6;Q9H993;Q9UFY5	GO:0006355|NAS
A4D2M5	GO:0018279|IDA GO:0018279|IDA GO:0018279|IDA GO:0018279|IDA
Q5T0R6	GO:0007049|NAS GO:0000070|TAS GO:0048015|NAS GO:0007051|NAS GO:0007049|NAS GO:0000070|TAS GO:0048015|NAS GO:0007051|NAS
Q5T0R5	GO:0007049|NAS GO:0000070|TAS GO:0048015|NAS GO:0007051|NAS GO:0007049|NAS GO:0000070|TAS GO:0048015|NAS GO:0007051|NAS
Q0VAC6	GO:0006464|NAS GO:0006464|NAS
Q3B7J1	GO:0008152|IDA GO:0006633|IDA GO:0008152|IDA GO:0006633|IDA
Q5T0R2	GO:0007049|NAS GO:0000070|TAS GO:0048015|NAS GO:0007051|NAS GO:0007049|NAS GO:0000070|TAS GO:0048015|NAS GO:0007051|NAS
O94903;Q6FI94	GO:0006139|TAS GO:0006139|TAS
Q5FWF4;Q9H0E8	GO:0006298|IMP GO:0043570|IMP GO:0006298|IDA GO:0006284|IDA GO:0007131|TAS GO:0006298|IMP GO:0043570|IMP GO:0006298|IDA GO:0006284|IDA
Q8N7C5;Q8N4J0;Q7Z383	GO:0006412|NAS
Q05BX1	GO:0006397|TAS GO:0008380|TAS GO:0006917|TAS GO:0006397|TAS GO:0008380|TAS GO:0006917|TAS
Q5T0R1	GO:0007049|NAS GO:0000070|TAS GO:0048015|NAS GO:0007051|NAS GO:0007049|NAS GO:0000070|TAS GO:0048015|NAS GO:0007051|NAS
Q86TP1	GO:0006419|TAS GO:0008033|TAS GO:0006412|NAS GO:0006412|NAS GO:0006419|TAS GO:0008033|TAS
Q0P663	GO:0009113|TAS GO:0009113|TAS
Q5T017	GO:0009103|NAS GO:0009103|NAS
Q5T0S3	GO:0007049|NAS GO:0000070|TAS GO:0048015|NAS GO:0007051|NAS GO:0007049|NAS GO:0000070|TAS GO:0048015|NAS GO:0007051|NAS
Q5JUX6	GO:0006944|TAS GO:0006944|TAS
Q9NV41;Q96HH6;Q53FY3	GO:0008654|NAS GO:0008654|NAS GO:0007601|TAS GO:0007165|TAS GO:0006629|TAS
Q9BYW9	GO:0007049|NAS GO:0000070|TAS GO:0048015|NAS GO:0007051|NAS GO:0007049|NAS GO:0000070|TAS GO:0048015|NAS GO:0007051|NAS
Q8WY66;Q9NXX6;Q5SQQ5;Q6P673;Q9BS90	GO:0006412|TAS
Q96IQ6	GO:0007292|TAS GO:0009451|TAS
Q9UBU6	GO:0015942|NAS GO:0015942|NAS
Q8WZ99	GO:0007186|NAS GO:0007399|TAS GO:0009887|TAS
Q96EY9	GO:0007585|TAS GO:0008535|TAS
Q4LE72	GO:0006944|TAS GO:0006944|TAS
A4FTY4	GO:0006401|TAS GO:0009615|TAS
Q8TBR4	GO:0006367|IDA GO:0030521|IDA GO:0045944|IDA GO:0006367|IDA GO:0030521|IDA GO:0045944|IDA
Q5T0R8	GO:0007049|NAS GO:0000070|TAS GO:0048015|NAS GO:0007051|NAS GO:0007049|NAS GO:0000070|TAS GO:0048015|NAS GO:0007051|NAS
Q5VVM3	GO:0045333|NAS GO:0006118|NAS
Q5T014	GO:0009103|NAS GO:0009103|NAS
Q8N1G4;Q9ULN5	GO:0006418|TAS GO:0006935|TAS GO:0007165|NAS GO:0006954|TAS GO:0006418|TAS GO:0006935|TAS GO:0007165|NAS GO:0006954|TAS
A2A397	GO:0030423|IEP
Q9Y6N5;Q9UQM8	GO:0006401|TAS GO:0009615|TAS
Q7Z5B1	GO:0009399|TAS GO:0016226|TAS GO:0009399|TAS GO:0016226|TAS
Q8NA83;Q8N3H2;Q8NHP6	GO:0006366|TAS
Q4G104	GO:0006508|TAS
Q5JPJ8	GO:0007049|NAS GO:0000070|TAS GO:0048015|NAS GO:0007051|NAS GO:0007049|NAS GO:0000070|TAS GO:0048015|NAS GO:0007051|NAS
Q5T0R3	GO:0007049|NAS GO:0000070|TAS GO:0048015|NAS GO:0007051|NAS GO:0007049|NAS GO:0000070|TAS GO:0048015|NAS GO:0007051|NAS
Q5VTK4	GO:0006595|TAS GO:0006555|TAS GO:0015992|TAS GO:0006099|TAS GO:0006118|TAS GO:0006595|TAS GO:0006555|TAS GO:0015992|TAS GO:0006099|TAS GO:0006118|TAS
O75423;O75424;O75425	GO:0006366|TAS
Q5H9C5;Q5H9C7;Q9UJG1	GO:0006366|TAS
Q9H7H0	GO:0007585|TAS GO:0008535|TAS
Q96IZ6;Q9H9G9;Q9P0B5;Q9NUI8	GO:0008152|IDA GO:0006633|IDA GO:0008152|IDA GO:0006633|IDA
Q5JUX4	GO:0006944|TAS GO:0006944|TAS
Q5T015	GO:0009103|NAS GO:0009103|NAS
Q5TFJ4	GO:0001561|IDA GO:0001561|IDA GO:0008285|TAS GO:0006436|TAS GO:0008285|TAS GO:0006436|TAS
Q5T9J8	GO:0006139|TAS GO:0006378|NAS GO:0006139|TAS
Q9NW94;Q8N3B7;Q8IZV6;Q9BRR8	GO:0000389|TAS GO:0006376|TAS GO:0006397|TAS GO:0000389|TAS GO:0006376|TAS GO:0006397|TAS
Q96EH3	GO:0006656|TAS GO:0006656|TAS GO:0008654|TAS
A4FTW1;Q15493;Q53FC9;Q5JRR5	GO:0006801|TAS GO:0015680|TAS
Q5TCW7	GO:0006370|IMP
Q6P275	GO:0006367|IDA GO:0030521|IDA GO:0045944|IDA GO:0006367|IDA GO:0030521|IDA GO:0045944|IDA
Q7L8W6;Q96HJ6	GO:0006449|TAS GO:0006449|TAS
Q5TGK5;Q6PDA1;Q8NEV7;Q8IWS9;Q8IWT0;Q8NEV6	GO:0006955|NAS
A2A3L6	GO:0007165|TAS GO:0006468|TAS GO:0007165|TAS GO:0006468|TAS
Q8NI37	GO:0007165|TAS GO:0006816|IDA GO:0009187|NAS GO:0007165|NAS GO:0007601|TAS
